# Supplementary material for: Isolation and Characterization of Lactic Acid Bacteria and Yeasts from Typical Bulgarian Sourdoughs
Source: MDPI journal article supplement (doi:10.3390/microorganisms9071346), 2021-06-22
Supplement: s1 [file s1]

**Table S1.** Molecular identification of LAB from Bulgarian sourdoughs by partial 16S rDNA sequence analysis.

| <b>№</b> | <b>Sourdough</b> | <b>Isolate</b> | <b>Closest relative (identity, %)</b>                          | <b>GenBank accession no.</b> |
|----------|------------------|----------------|----------------------------------------------------------------|------------------------------|
| <b>1</b> | <b>01M</b>       | 01M02          | <i>Lactobacillus brevis</i> (100.00)                           | MW685433                     |
|          |                  | 01M06          | <i>Lactobacillus brevis</i> (100.00)                           | MW685432                     |
|          |                  | 01M09          | <i>Lactobacillus plantarum</i> (99.43)                         | MW774565                     |
|          |                  | 01M11          | <i>Lactobacillus plantarum</i> (100.00)                        | MW682229                     |
|          |                  | 01M12          | <i>Lactobacillus plantarum</i> (99.23)                         | MW682230                     |
|          |                  | 01M18          | <i>Lactobacillus plantarum</i> (100.00)                        | MW682231                     |
|          |                  | 01M19          | <i>Lactobacillus brevis</i> (99.66)                            | MW685431                     |
|          |                  | 01M20          | <i>Lactobacillus plantarum</i> (100.00)                        | MW682225                     |
|          |                  | 01M21          | <i>Lactobacillus brevis</i> (99.47)                            | MW685439                     |
|          |                  | 01M22          | <i>Lactobacillus brevis</i> (99.43)                            | MW685430                     |
|          |                  | 01M24          | <i>Lactobacillus plantarum</i> (99.56)                         | MW682227                     |
|          |                  | 01M25          | <i>Lactobacillus plantarum</i> (100.00)                        | MW682233                     |
|          |                  | 01M26          | <i>Lactobacillus plantarum</i> (100.00)                        | MW682226                     |
|          |                  | 01M28          | <i>Lactobacillus plantarum</i> (100.00)                        | MW682234                     |
|          |                  | 01M29          | <i>Lactobacillus brevis</i> (100.00)                           | MW685429                     |
|          |                  | 01M30          | <i>Lactobacillus plantarum</i> (97.95)                         | MW682235                     |
| <b>2</b> | <b>02P1</b>      | 02P103         | <i>Pediococcus pentosaceus</i> (100.00)                        | MW683145                     |
|          |                  | 02P104         | <i>Pediococcus acidilactici</i> (99.25)                        | MW683129                     |
|          |                  | 02P108         | <i>Pediococcus acidilactici</i> (100.00)                       | MW683131                     |
|          |                  | 02P109         | <i>Lactobacillus plantarum</i> (100.00)                        | MW682236                     |
|          |                  | 02P111         | <i>Pediococcus pentosaceus</i> (99.47)                         | MW683146                     |
|          |                  | 02P113         | <i>Pediococcus pentosaceus</i> (100.00)                        | MW683176                     |
|          |                  | 02P115         | <i>Pediococcus pentosaceus</i> (99.91)                         | MW683177                     |
|          |                  | 02P116         | <i>Lactobacillus plantarum</i> (98.89)                         | MW682237                     |
|          |                  | 02P117         | <i>Lactobacillus plantarum</i> subsp. <i>plantarum</i> (98.91) | MW682281                     |
|          |                  | 02P118         | <i>Lactobacillus brevis</i> (98.37)                            | MW685437                     |
|          |                  | 02P119         | <i>Lactobacillus plantarum</i> (100.00)                        | MW682238                     |
|          |                  | 02P120         | <i>Lactobacillus plantarum</i> (100.00)                        | MW682239                     |
|          |                  | 02P121         | <i>Lactobacillus plantarum</i> (100.00)                        | MW682240                     |
| <b>3</b> | <b>03P2</b>      | 03P226         | <i>Pediococcus parvulus</i> (100.00)                           | MW694895                     |
|          |                  | 03P234         | <i>Pediococcus pentosaceus</i> (99.92)                         | MW774567                     |
|          |                  | 03P2102        | <i>Pediococcus pentosaceus</i> (99.25)                         | MW683147                     |
|          |                  | 03P2187        | <i>Pediococcus acidilactici</i> (99.73)                        | MW683132                     |
|          |                  | 03P2201        | <i>Pediococcus pentosaceus</i> (100.00)                        | MW683148                     |
|          |                  | 03P2218        | <i>Pediococcus pentosaceus</i> (99.72)                         | MW683178                     |
|          |                  | 03P2224        | <i>Lactobacillus plantarum</i> (99.82)                         | MW682241                     |
|          |                  | 03P2233        | <i>Lactobacillus plantarum</i> (100.00)                        | MW682242                     |
|          |                  | 03P226         | <i>Lactobacillus brevis</i> (100.00)                           | MW685427                     |
| <b>4</b> | <b>04P3</b>      | 04P306         | <i>Pediococcus pentosaceus</i> (100.00)                        | MW683179                     |
|          |                  | 04P317         | <i>Pediococcus pentosaceus</i> (99.51)                         | MW683149                     |
|          |                  | 04P325         | <i>Pediococcus pentosaceus</i> (99.83)                         | MW683150                     |
|          |                  | 04P329         | <i>Pediococcus pentosaceus</i> (99.22)                         | MW683180                     |
|          |                  | 04P347         | <i>Pediococcus pentosaceus</i> (100.00)                        | MW683181                     |
|          |                  | 04P394         | <i>Lactobacillus plantarum</i> (99.25)                         | MW774566                     |
|          |                  | 04P3107        | <i>Lactobacillus plantarum</i> (100.00)                        | MW682224                     |
|          |                  | 04P3167        | <i>Lactobacillus brevis</i> (100.00)                           | MW685426                     |
|          |                  | 04P3188        | <i>Lactobacillus plantarum</i> (99.68)                         | MW682223                     |

|   |      |         |                                                                |          |
|---|------|---------|----------------------------------------------------------------|----------|
|   |      | 04P3197 | <i>Lactobacillus plantarum</i> (100.00)                        | MW682243 |
|   |      | 04P201  | <i>Lactobacillus plantarum</i> (97.82)                         | MW682228 |
| 5 | 05S  | 05S04   | <i>Lactobacillus brevis</i> (100.00)                           | MW685425 |
|   |      | 05S16   | <i>Lactobacillus plantarum</i> (100.00)                        | MW682244 |
|   |      | 05S27   | <i>Pediococcus acidilactici</i> (99.86)                        | MW683133 |
|   |      | 05S29   | <i>Lactobacillus plantarum</i> (100.00)                        | MW682245 |
|   |      | 05S76   | <i>Pediococcus pentosaceus</i> (99.06)                         | MW683182 |
|   |      | 05S88   | <i>Lactobacillus plantarum</i> (99.57)                         | MW682246 |
|   |      | 05S103  | <i>Lactobacillus plantarum</i> (99.58)                         | MW682222 |
|   |      | 05S148  | <i>Lactobacillus plantarum</i> (100.00)                        | MW682247 |
|   |      | 05S168  | <i>Lactobacillus brevis</i> (100.00)                           | MW685424 |
|   |      | 05S178  | <i>Lactobacillus brevis</i> (100.00)                           | MW685423 |
|   |      | 05S179  | <i>Lactobacillus plantarum</i> (99.61)                         | MW682248 |
|   |      | 05S186  | <i>Lactobacillus plantarum</i> (100.00)                        | MW682249 |
|   |      | 05S189  | <i>Lactobacillus plantarum</i> (99.26)                         | MW682250 |
|   |      | 05S197  | <i>Lactobacillus plantarum</i> subsp. <i>plantarum</i> (99.16) | MW682221 |
| 6 | 06SE | 06SE12  | <i>Pediococcus pentosaceus</i> (99.84)                         | MW683183 |
|   |      | 06SE17  | <i>Pediococcus pentosaceus</i> (99.06)                         | MW683152 |
|   |      | 06SE22  | <i>Pediococcus pentosaceus</i> (100.00)                        | MW683153 |
|   |      | 06SE27  | <i>Pediococcus pentosaceus</i> (100.00)                        | MW683184 |
|   |      | 06SE75  | <i>Pediococcus acidilactici</i> (100.00)                       | MW683134 |
|   |      | 06SE78  | <i>Pediococcus pentosaceus</i> (100.00)                        | MW683185 |
|   |      | 06SE92  | <i>Pediococcus acidilactici</i> (100.00)                       | MW683135 |
|   |      | 06SE98  | <i>Pediococcus acidilactici</i> (100.00)                       | MW683136 |
|   |      | 06SE99  | <i>Pediococcus acidilactici</i> (100.00)                       | MW683137 |
|   |      | 06SE107 | <i>Pediococcus acidilactici</i> (100.00)                       | MW683138 |
|   |      | 06SE128 | <i>Pediococcus pentosaceus</i> (100.00)                        | MW683186 |
|   |      | 06SE157 | <i>Pediococcus pentosaceus</i> (100.00)                        | MW683187 |
|   |      | 06SE173 | <i>Pediococcus pentosaceus</i> (100.00)                        | MW683188 |
|   |      | 06SE204 | <i>Pediococcus pentosaceus</i> (100.00)                        | MW683189 |
|   |      | 06SE234 | <i>Pediococcus acidilactici</i> (100.00)                       | MW683139 |
|   |      | 06SE247 | <i>Pediococcus pentosaceus</i> (100.00)                        | MW683190 |
|   |      | 06SE251 | <i>Pediococcus pentosaceus</i> (100.00)                        | MW683154 |
|   |      | 06SE258 | <i>Pediococcus pentosaceus</i> (99.90)                         | MW683155 |
|   |      | 06SE269 | <i>Lactobacillus brevis</i> (97.83)                            | MW685422 |
|   |      | 06SE274 | <i>Pediococcus pentosaceus</i> (99.05)                         | MW683156 |
|   |      | 06SE279 | <i>Enterococcus faecium</i> (99.25)                            | MW682282 |
|   |      | 06SE284 | <i>Pediococcus pentosaceus</i> (100.00)                        | MW683191 |
|   |      | 06SE288 | <i>Pediococcus acidilactici</i> (100.00)                       | MW683140 |
|   |      | 06SE294 | <i>Pediococcus acidilactici</i> (100.00)                       | MW683141 |
|   |      | 06SE297 | <i>Pediococcus pentosaceus</i> (100.00)                        | MW683192 |
|   |      | 06SE342 | <i>Pediococcus acidilactici</i> (100.00)                       | MW683142 |
| 7 | 07B1 | 07B110  | <i>Lactobacillus plantarum</i> (100.00)                        | MW682251 |
|   |      | 07B126  | <i>Lactobacillus plantarum</i> (100.00)                        | MW682252 |
|   |      | 07B144  | <i>Lactobacillus plantarum</i> (100.00)                        | MW682253 |
|   |      | 07B163  | <i>Lactobacillus plantarum</i> (100.00)                        | MW682254 |
|   |      | 07B169  | <i>Pediococcus pentosaceus</i> (98.98)                         | MW683193 |
|   |      | 07B181  | <i>Pediococcus pentosaceus</i> (98.61)                         | MW683194 |
|   |      | 07B187  | <i>Lactobacillus plantarum</i> (99.86)                         | MW682255 |
|   |      | 07B198  | <i>Lactobacillus brevis</i> (99.48)                            | MW685435 |

|    |      |         |                                         |            |
|----|------|---------|-----------------------------------------|------------|
|    |      | 07B1109 | <i>Pediococcus pentosaceus</i> (99.20)  | MW683195   |
|    |      | 07B1111 | <i>Pediococcus pentosaceus</i> (98.81)  | MW683196   |
|    |      | 07B1119 | <i>Pediococcus pentosaceus</i> (99.83)  | MW683157   |
|    |      | 07B1138 | <i>Lactobacillus plantarum</i> (100.00) | MW682256   |
|    |      | 07B1139 | <i>Lactobacillus plantarum</i> (100.00) | MW682257   |
|    |      | 07B1168 | <i>Lactobacillus plantarum</i> (100.00) | MN251169.1 |
|    |      | 07B1187 | <i>Enterococcus faecium</i> (100.00)    | MW682287   |
|    |      | 07B1188 | <i>Pediococcus pentosaceus</i> (100.00) | MW683158   |
| 8  | 08B2 | 08B201  | <i>Lactobacillus brevis</i> (98.51)     | MW685428   |
|    |      | 08B212  | <i>Lactobacillus plantarum</i> (100.00) | MW682259   |
|    |      | 08B217  | <i>Lactobacillus plantarum</i> (99.67)  | MW682260   |
|    |      | 08B225  | <i>Lactobacillus brevis</i> (99.36)     | MW685421   |
|    |      | 08B228  | <i>Pediococcus pentosaceus</i> (100.00) | MW683159   |
|    |      | 08B238  | <i>Lactobacillus plantarum</i> (100.00) | MW682261   |
|    |      | 08B262  | <i>Pediococcus pentosaceus</i> (97.20)  | MW683160   |
|    |      | 08B268  | <i>Pediococcus pentosaceus</i> (99.82)  | MW683161   |
|    |      | 08B277  | <i>Pediococcus pentosaceus</i> (98.05)  | MW683162   |
|    |      | 08B279  | <i>Pediococcus pentosaceus</i> (99.80)  | MW683163   |
|    |      | 08B285  | <i>Pediococcus pentosaceus</i> (99.15)  | MW683197   |
|    |      | 08B291  | <i>Lactobacillus brevis</i> (99.11)     | MW685438   |
|    |      | 08B296  | <i>Pediococcus pentosaceus</i> (100.00) | MW683198   |
|    |      | 08B297  | <i>Pediococcus pentosaceus</i> (99.57)  | MW683199   |
| 9  | 09B3 | 09B307  | <i>Lactobacillus plantarum</i> (100.00) | MW682262   |
|    |      | 09B316  | <i>Lactobacillus plantarum</i> (100.00) | MW682263   |
|    |      | 09B324  | <i>Lactobacillus plantarum</i> (100.00) | MW682264   |
|    |      | 09B357  | <i>Lactobacillus plantarum</i> (100.00) | MW682265   |
|    |      | 09B374  | <i>Enterococcus durans</i> (99.75)      | MW682284   |
|    |      | 09B378  | <i>Pediococcus pentosaceus</i> (99.83)  | MW683164   |
|    |      | 09B383  | <i>Pediococcus pentosaceus</i> (99.63)  | MW683165   |
|    |      | 09B391  | <i>Pediococcus pentosaceus</i> (99.66)  | MW683166   |
|    |      | 09B3105 | <i>Lactobacillus brevis</i> (100.00)    | MW685420   |
|    |      | 09B3154 | <i>Pediococcus pentosaceus</i> (99.57)  | MW683167   |
| 10 | 10B4 | 09B3184 | <i>Pediococcus pentosaceus</i> (99.72)  | MW683168   |
|    |      | 10B412  | <i>Lactobacillus plantarum</i> (100.00) | MW682266   |
|    |      | 10B426  | <i>Lactobacillus plantarum</i> (100.00) | MW682267   |
|    |      | 10B429  | <i>Pediococcus pentosaceus</i> (99.30)  | MW683170   |
|    |      | 10B447  | <i>Lactobacillus plantarum</i> (100.00) | MW682268   |
|    |      | 10B458  | <i>Lactobacillus plantarum</i> (100.00) | MW682269   |
|    |      | 10B487  | <i>Lactobacillus plantarum</i> (100.00) | MW682270   |
|    |      | 10B4101 | <i>Lactobacillus plantarum</i> (100.00) | MW682271   |
|    |      | 10B4116 | <i>Lactobacillus plantarum</i> (100.00) | MW682272   |
|    |      | 10B4122 | <i>Lactobacillus plantarum</i> (100.00) | MW682273   |
|    |      | 10B4128 | <i>Lactobacillus plantarum</i> (100.00) | MW682274   |
|    |      | 10B4147 | <i>Lactobacillus plantarum</i> (100.00) | MW682275   |
|    |      | 10B4159 | <i>Lactobacillus plantarum</i> (100.00) | MW682276   |
|    |      | 10B4181 | <i>Lactobacillus plantarum</i> (100.00) | MW682277   |
|    |      | 10B4227 | <i>Lactobacillus plantarum</i> (100.00) | MW682278   |
|    |      | 10B4261 | <i>Lactobacillus plantarum</i> (100.00) | MW682279   |
|    |      | 10B4267 | <i>Lactobacillus plantarum</i> (100.00) | MW682280   |
|    |      | 10B280  | <i>Pediococcus pentosaceus</i> (100.00) | MW683169   |
| 11 | 11R1 | 11R115  | <i>Pediococcus pentosaceus</i> (100.00) | MW683200   |

|    |      |         |                                                                |          |
|----|------|---------|----------------------------------------------------------------|----------|
|    |      | 11R161  | <i>Pediococcus pentosaceus</i> (99.46)                         | MW683171 |
|    |      | 11R187  | <i>Pediococcus pentosaceus</i> (99.84)                         | MW683172 |
|    |      | 11R1102 | <i>Pediococcus pentosaceus</i> (100.00)                        | MW683173 |
|    |      | 11R1131 | <i>Lactobacillus plantarum</i> subsp. <i>plantarum</i> (99.63) | MW682219 |
|    |      | 11R1143 | <i>Lactobacillus brevis</i> (97.57)                            | MW685436 |
|    |      | 11R1149 | <i>Lactobacillus brevis</i> (100.00)                           | MW685419 |
|    |      | 11R1154 | <i>Pediococcus acidilactici</i> (98.61)                        | MW683143 |
| 12 | 12R2 | 12R204  | <i>Enterococcus faecium</i> (100.00)                           | MW682286 |
|    |      | 12R226  | <i>Enterococcus faecium</i> (100.00)                           | MW682285 |
|    |      | 12R232  | <i>Enterococcus faecium</i> (99.07)                            | MW682283 |
|    |      | 12R238  | <i>Lactobacillus plantarum</i> subsp. <i>plantarum</i> (99.77) | MW682220 |
|    |      | 12R287  | <i>Lactobacillus brevis</i> (98.41)                            | MW685418 |
|    |      | 12R298  | <i>Pediococcus pentosaceus</i> (99.66)                         | MW683174 |
|    |      | 12R2104 | <i>Pediococcus pentosaceus</i> (99.59)                         | MW683201 |
|    |      | 12R2121 | <i>Pediococcus acidilactici</i> (99.81)                        | MW683144 |
|    |      | 12R2162 | <i>Lactobacillus brevis</i> (99.59)                            | MW685434 |
|    |      | 12R2169 | <i>Pediococcus acidilactici</i> (98.85)                        | MW683130 |
|    |      | 12R2187 | <i>Pediococcus pentosaceus</i> (99.17)                         | MW683202 |
|    |      | 12R2192 | <i>Pediococcus pentosaceus</i> (100.00)                        | MW683175 |
