# Supplementary material for: Isolation and Characterization of Lactic Acid Bacteria and Yeasts from Typical Bulgarian Sourdoughs
Source: MDPI journal article supplement (doi:10.3390/microorganisms9071346), 2021-06-22
Supplement: s1 [file s1]

**Table S2.** Molecular identification of yeast from Bulgarian sourdoughs by partial sequences analysis of ITS1-5.8S-ITS2 region.

| <b>№</b> | <b>Sourdough</b> | <b>Isolate</b> | <b>Closest relative (identity, %)</b>    | <b>GenBank accession no.</b> |
|----------|------------------|----------------|------------------------------------------|------------------------------|
| 1        | 01M              | 01M06          | <i>Saccharomyces cerevisiae</i> (100.00) | MW756304                     |
|          |                  | 01M28          | <i>Saccharomyces cerevisiae</i> (100.00) | MW756303                     |
|          |                  | 01M81          | <i>Saccharomyces cerevisiae</i> (100.00) | MW756299                     |
|          |                  | 01M103         | <i>Saccharomyces cerevisiae</i> (100.00) | MW756228                     |
|          |                  | 01M148         | <i>Kazachstania barnettii</i> (100.00)   | MW756315                     |
|          |                  | 01M173         | <i>Saccharomyces cerevisiae</i> (100.00) | MW756229                     |
|          |                  | 01M184         | <i>Saccharomyces cerevisiae</i> (100.00) | MW756230                     |
| 2        | 02P1             | 02P112         | <i>Pichia fermentans</i> (100.00)        | MW756305                     |
|          |                  | 02P141         | <i>Kazachstania barnettii</i> (100.00)   | MW756227                     |
|          |                  | 02P152         | <i>Saccharomyces cerevisiae</i> (100.00) | MW774571                     |
|          |                  | 02P167         | <i>Saccharomyces cerevisiae</i> (100.00) | MW756231                     |
|          |                  | 02P185         | <i>Saccharomyces cerevisiae</i> (100.00) | MW756232                     |
|          |                  | 02P1102        | <i>Saccharomyces cerevisiae</i> (100.00) | MW756233                     |
|          |                  | 02P1127        | <i>Saccharomyces cerevisiae</i> (100.00) | MW756234                     |
|          |                  | 02P1188        | <i>Saccharomyces cerevisiae</i> (100.00) | MW756288                     |
| 3        | 03P2             | 03P208         | <i>Kluyveromyces marxianus</i> (100.00)  | MW756309                     |
|          |                  | 03P218         | <i>Kazachstania barnettii</i> (100.00)   | MW756319                     |
|          |                  | 03P222         | <i>Saccharomyces cerevisiae</i> (100.00) | MW756289                     |
|          |                  | 03P297         | <i>Saccharomyces cerevisiae</i> (100.00) | MW756224                     |
|          |                  | 03P2101        | <i>Saccharomyces cerevisiae</i> (100.00) | MW756298                     |
|          |                  | 03P2127        | <i>Saccharomyces cerevisiae</i> (100.00) | MW756318                     |
|          |                  | 03P2143        | <i>Saccharomyces cerevisiae</i> (100.00) | MW756290                     |
|          |                  | 03P2187        | <i>Saccharomyces cerevisiae</i> (100.00) | MW756291                     |
|          |                  | 03P2207        | <i>Saccharomyces cerevisiae</i> (100.00) | MW756292                     |
|          |                  | 03P2211        | <i>Saccharomyces cerevisiae</i> (100.00) | MW756312                     |
|          |                  | 03P2217        | <i>Saccharomyces cerevisiae</i> (100.00) | MW756293                     |
|          |                  | 03P2221        | <i>Saccharomyces cerevisiae</i> (100.00) | MW756294                     |
| 4        | 04P3             | 04P309         | <i>Yarrowia lipolytica</i> (100.00)      | MW756276                     |
|          |                  | 04P327         | <i>Saccharomyces cerevisiae</i> (100.00) | MW774572                     |
|          |                  | 04P338         | <i>Saccharomyces cerevisiae</i> (100.00) | MW756296                     |
|          |                  | 04P310         | <i>Kluyveromyces marxianus</i> (100.00)  | MW756308                     |
|          |                  | 04P354         | <i>Saccharomyces cerevisiae</i> (100.00) | MW756295                     |
|          |                  | 04P387         | <i>Saccharomyces cerevisiae</i> (100.00) | MW756297                     |
|          |                  | 04P391         | <i>Saccharomyces cerevisiae</i> (98.00)  | MW756236                     |
|          |                  | 04P3141        | <i>Saccharomyces cerevisiae</i> (100.00) | MW756237                     |
|          |                  | 04P3154        | <i>Saccharomyces cerevisiae</i> (100.00) | MW756238                     |
|          |                  | 04P3169        | <i>Saccharomyces cerevisiae</i> (100.00) | MW756239                     |
| 5        | 05S              | 05S01          | <i>Saccharomyces cerevisiae</i> (100.00) | MW756241                     |
|          |                  | 05S04          | <i>Saccharomyces cerevisiae</i> (100.00) | MW756242                     |
|          |                  | 05S18          | <i>Saccharomyces cerevisiae</i> (100.00) | MW756243                     |
|          |                  | 05S28          | <i>Saccharomyces cerevisiae</i> (100.00) | MW756287                     |
|          |                  | 05S34          | <i>Saccharomyces cerevisiae</i> (100.00) | MW756316                     |
|          |                  | 05S57          | <i>Saccharomyces cerevisiae</i> (100.00) | MW756317                     |
|          |                  | 05S59          | <i>Saccharomyces cerevisiae</i> (100.00) | MW756244                     |
|          |                  | 05S79          | <i>Saccharomyces cerevisiae</i> (100.00) | MW756212                     |
|          |                  | 05S91          | <i>Saccharomyces cerevisiae</i> (100.00) | MW756213                     |
|          |                  | 05S141         | <i>Saccharomyces cerevisiae</i> (100.00) | MW756214                     |
|          |                  | 05S173         | <i>Saccharomyces cerevisiae</i> (99.23)  | MW756245                     |
| 6        | 06SE             | 06SE07         | <i>Saccharomyces cerevisiae</i> (100.00) | MW756246                     |
|          |                  | 06SE28         | <i>Kazachstania humilis</i> (100.00)     | MW756310                     |
|          |                  | 06SE31         | <i>Kluyveromyces marxianus</i> (100.00)  | MW756307                     |
|          |                  | 06SE58         | <i>Kazachstania barnettii</i> (100.00)   | MW756225                     |

|    |      |         |                                          |          |
|----|------|---------|------------------------------------------|----------|
|    |      | 06SE91  | <i>Saccharomyces cerevisiae</i> (100.00) | MW756215 |
|    |      | 06SE107 | <i>Saccharomyces cerevisiae</i> (100.00) | MW756247 |
|    |      | 06SE127 | <i>Saccharomyces cerevisiae</i> (100.00) | MW756314 |
|    |      | 06SE142 | <i>Saccharomyces cerevisiae</i> (100.00) | MW756248 |
|    |      | 06SE151 | <i>Saccharomyces cerevisiae</i> (100.00) | MW756223 |
| 7  | 07B1 | 07B104  | <i>Saccharomyces cerevisiae</i> (100.00) | MW756249 |
|    |      | 07B141  | <i>Kluyveromyces marxianus</i> (100.00)  | MW756306 |
|    |      | 07B162  | <i>Pichia fermentans</i> (100.00)        | MW756302 |
|    |      | 07B192  | <i>Saccharomyces cerevisiae</i> (100.00) | MW756286 |
|    |      | 07B1100 | <i>Saccharomyces cerevisiae</i> (100.00) | MW756250 |
|    |      | 07B1121 | <i>Saccharomyces cerevisiae</i> (100.00) | MW756251 |
|    |      | 07B1131 | <i>Saccharomyces cerevisiae</i> (100.00) | MW756252 |
|    |      | 07B1138 | <i>Saccharomyces cerevisiae</i> (100.00) | MW756285 |
| 8  | 08B2 | 08B209  | <i>Saccharomyces cerevisiae</i> (100.00) | MW756253 |
|    |      | 08B210  | <i>Saccharomyces cerevisiae</i> (100.00) | MW756254 |
|    |      | 08B217  | <i>Saccharomyces cerevisiae</i> (100.00) | MW756284 |
|    |      | 08B221  | <i>Saccharomyces cerevisiae</i> (100.00) | MW756255 |
|    |      | 08B228  | <i>Saccharomyces cerevisiae</i> (100.00) | MW756256 |
|    |      | 08B247  | <i>Saccharomyces cerevisiae</i> (100.00) | MW756257 |
|    |      | 08B252  | <i>Saccharomyces cerevisiae</i> (100.00) | MW756258 |
|    |      | 08B274  | <i>Saccharomyces cerevisiae</i> (100.00) | MW756259 |
| 9  | 09B3 | 09B305  | <i>Saccharomyces cerevisiae</i> (100.00) | MW756260 |
|    |      | 09B317  | <i>Saccharomyces cerevisiae</i> (100.00) | MW756261 |
|    |      | 09B328  | <i>Saccharomyces cerevisiae</i> (100.00) | MW756221 |
|    |      | 09B339  | <i>Yarrowia lipolytica</i> (100.00)      | MW756277 |
|    |      | 09B351  | <i>Kazachstania barnettii</i> (100.00)   | MW756226 |
|    |      | 09B357  | <i>Saccharomyces cerevisiae</i> (100.00) | MW756279 |
|    |      | 09B374  | <i>Saccharomyces cerevisiae</i> (100.00) | MW756280 |
|    |      | 09B379  | <i>Saccharomyces cerevisiae</i> (100.00) | MW756281 |
| 10 | 10B4 | 09B388  | <i>Saccharomyces cerevisiae</i> (100.00) | MW774573 |
|    |      | 10B411  | <i>Saccharomyces cerevisiae</i> (100.00) | MW756283 |
|    |      | 10B417  | <i>Saccharomyces cerevisiae</i> (100.00) | MW756222 |
|    |      | 10B478  | <i>Saccharomyces cerevisiae</i> (98.63)  | MW756216 |
|    |      | 10B482  | <i>Saccharomyces cerevisiae</i> (100.00) | MW756217 |
|    |      | 10B487  | <i>Saccharomyces cerevisiae</i> (100.00) | MW756218 |
|    |      | 10B489  | <i>Saccharomyces cerevisiae</i> (100.00) | MW756262 |
|    |      | 10B495  | <i>Saccharomyces cerevisiae</i> (100.00) | MW756219 |
| 11 | 11R1 | 10B4102 | <i>Saccharomyces cerevisiae</i> (100.00) | MW756263 |
|    |      | 10B4111 | <i>Saccharomyces cerevisiae</i> (100.00) | MW756264 |
|    |      | 11R102  | <i>Saccharomyces cerevisiae</i> (100.00) | MW756265 |
|    |      | 11R114  | <i>Saccharomyces cerevisiae</i> (100.00) | MW756266 |
|    |      | 11R117  | <i>Saccharomyces cerevisiae</i> (99.86)  | MW756300 |
|    |      | 11R127  | <i>Saccharomyces cerevisiae</i> (99.47)  | MW756220 |
|    |      | 11R139  | <i>Saccharomyces cerevisiae</i> (100.00) | MW756278 |
|    |      | 11R159  | <i>Saccharomyces cerevisiae</i> (100.00) | MW756267 |
| 12 | 12R2 | 11R1119 | <i>Saccharomyces cerevisiae</i> (100.00) | MW756268 |
|    |      | 11R1124 | <i>Saccharomyces cerevisiae</i> (100.00) | MW756269 |
|    |      | 11R1128 | <i>Saccharomyces cerevisiae</i> (100.00) | MW756270 |
|    |      | 12R210  | <i>Saccharomyces cerevisiae</i> (100.00) | MW756271 |
|    |      | 12R216  | <i>Saccharomyces cerevisiae</i> (100.00) | MW756272 |
|    |      | 12R227  | <i>Saccharomyces cerevisiae</i> (100.00) | MW756273 |
|    |      | 12R239  | <i>Saccharomyces cerevisiae</i> (100.00) | MW756274 |
|    |      | 12R241  | <i>Saccharomyces cerevisiae</i> (100.00) | MW756275 |
