# Supplementary material for: Isolation and Characterization of Lactic Acid Bacteria and Yeasts from Typical Bulgarian Sourdoughs
Source: MDPI journal article supplement (doi:10.3390/microorganisms9071346), 2021-06-22
Supplement: s1 [file s1]

**Table S3.** Amylolytic, proteolytic activity and acid producing capacity of lactic acid bacteria isolated from sourdoughs.

| No. | LAB strain                             | Amylolytic index | Protein hydrolysis index | Acid producing capacity ( $\Delta$ pH) |
|-----|----------------------------------------|------------------|--------------------------|----------------------------------------|
| 1   | <i>Pediococcus pentosaceus</i> 02P103  | 3.83 $\pm$ 0.02  | 4.62 $\pm$ 0.04          | 1.62 $\pm$ 0.03                        |
| 2   | <i>Pediococcus pentosaceus</i> 02P111  | 3.61 $\pm$ 0.06  | 4.48 $\pm$ 0.03          | 1.51 $\pm$ 0.03                        |
| 3   | <i>Pediococcus pentosaceus</i> 02P113  | 2.57 $\pm$ 0.11  | 4.24 $\pm$ 0.02          | 1.38 $\pm$ 0.02                        |
| 4   | <i>Pediococcus pentosaceus</i> 02P115  | 4.02 $\pm$ 0.08  | 4.68 $\pm$ 0.02          | 1.47 $\pm$ 0.03                        |
| 5   | <i>Pediococcus pentosaceus</i> 03P234  | 3.28 $\pm$ 0.09  | 4.78 $\pm$ 0.04          | 1.64 $\pm$ 0.02                        |
| 6   | <i>Pediococcus pentosaceus</i> 03P2102 | 3.69 $\pm$ 0.10  | 3.98 $\pm$ 0.04          | 1.22 $\pm$ 0.02                        |
| 7   | <i>Pediococcus pentosaceus</i> 03P2201 | 4.67 $\pm$ 0.04  | 4.98 $\pm$ 0.02          | 1.41 $\pm$ 0.03                        |
| 8   | <i>Pediococcus pentosaceus</i> 03P2218 | 2.94 $\pm$ 0.06  | 4.38 $\pm$ 0.06          | 1.29 $\pm$ 0.03                        |
| 9   | <i>Pediococcus pentosaceus</i> 04P306  | 3.57 $\pm$ 0.03  | 4.14 $\pm$ 0.04          | 1.74 $\pm$ 0.02                        |
| 10  | <i>Pediococcus pentosaceus</i> 04P317  | 3.95 $\pm$ 0.06  | 4.74 $\pm$ 0.06          | 1.35 $\pm$ 0.02                        |
| 11  | <i>Pediococcus pentosaceus</i> 04P325  | 4.68 $\pm$ 0.05  | 4.28 $\pm$ 0.04          | 1.63 $\pm$ 0.03                        |
| 12  | <i>Pediococcus pentosaceus</i> 04P329  | 2.05 $\pm$ 0.04  | 3.88 $\pm$ 0.02          | 1.62 $\pm$ 0.02                        |
| 13  | <i>Pediococcus pentosaceus</i> 04P347  | 2.66 $\pm$ 0.06  | 4.73 $\pm$ 0.04          | 1.44 $\pm$ 0.02                        |
| 14  | <i>Pediococcus pentosaceus</i> 05S76   | 4.53 $\pm$ 0.09  | 4.83 $\pm$ 0.02          | 1.46 $\pm$ 0.02                        |
| 15  | <i>Pediococcus pentosaceus</i> 06SE12  | 4.71 $\pm$ 0.06  | 4.37 $\pm$ 0.04          | 1.23 $\pm$ 0.03                        |
| 16  | <i>Pediococcus pentosaceus</i> 06SE17  | 3.28 $\pm$ 0.04  | 3.68 $\pm$ 0.05          | 1.46 $\pm$ 0.03                        |
| 17  | <i>Pediococcus pentosaceus</i> 06SE22  | 3.14 $\pm$ 0.08  | 4.58 $\pm$ 0.02          | 1.63 $\pm$ 0.02                        |
| 18  | <i>Pediococcus pentosaceus</i> 06SE27  | 3.32 $\pm$ 0.12  | 4.69 $\pm$ 0.03          | 1.66 $\pm$ 0.02                        |
| 19  | <i>Pediococcus pentosaceus</i> 06SE128 | 3.68 $\pm$ 0.04  | 4.25 $\pm$ 0.04          | 1.54 $\pm$ 0.03                        |
| 20  | <i>Pediococcus pentosaceus</i> 06SE157 | 4.12 $\pm$ 0.08  | 4.38 $\pm$ 0.03          | 1.26 $\pm$ 0.02                        |
| 21  | <i>Pediococcus pentosaceus</i> 06SE173 | 2.68 $\pm$ 0.06  | 4.88 $\pm$ 0.02          | 1.57 $\pm$ 0.03                        |
| 22  | <i>Pediococcus pentosaceus</i> 06SE204 | 3.04 $\pm$ 0.11  | 4.57 $\pm$ 0.06          | 1.58 $\pm$ 0.03                        |
| 23  | <i>Pediococcus pentosaceus</i> 06SE247 | 2.84 $\pm$ 0.04  | 4.47 $\pm$ 0.03          | 1.74 $\pm$ 0.03                        |
| 24  | <i>Pediococcus pentosaceus</i> 06SE251 | 4.29 $\pm$ 0.10  | 4.84 $\pm$ 0.06          | 1.68 $\pm$ 0.03                        |
| 25  | <i>Pediococcus pentosaceus</i> 06SE258 | 3.69 $\pm$ 0.02  | 4.83 $\pm$ 0.02          | 1.45 $\pm$ 0.02                        |
| 26  | <i>Pediococcus pentosaceus</i> 06SE274 | 3.27 $\pm$ 0.06  | 3.56 $\pm$ 0.04          | 1.42 $\pm$ 0.02                        |
| 27  | <i>Pediococcus pentosaceus</i> 06SE284 | 3.86 $\pm$ 0.04  | 4.86 $\pm$ 0.02          | 1.58 $\pm$ 0.02                        |
| 28  | <i>Pediococcus pentosaceus</i> 06SE297 | 3.53 $\pm$ 0.04  | 4.88 $\pm$ 0.04          | 1.62 $\pm$ 0.02                        |
| 29  | <i>Pediococcus pentosaceus</i> 07B169  | 3.19 $\pm$ 0.02  | 4.52 $\pm$ 0.05          | 1.62 $\pm$ 0.03                        |
| 30  | <i>Pediococcus pentosaceus</i> 07B181  | 2.96 $\pm$ 0.08  | 4.48 $\pm$ 0.08          | 1.32 $\pm$ 0.03                        |
| 31  | <i>Pediococcus pentosaceus</i> 07B1109 | 4.98 $\pm$ 0.05  | 5.12 $\pm$ 0.06          | 1.84 $\pm$ 0.02                        |
| 32  | <i>Pediococcus pentosaceus</i> 07B1111 | 3.39 $\pm$ 0.04  | 4.78 $\pm$ 0.02          | 1.67 $\pm$ 0.03                        |
| 33  | <i>Pediococcus pentosaceus</i> 07B1119 | 2.68 $\pm$ 0.07  | 4.88 $\pm$ 0.04          | 1.47 $\pm$ 0.02                        |
| 34  | <i>Pediococcus pentosaceus</i> 07B1188 | 3.12 $\pm$ 0.02  | 4.14 $\pm$ 0.05          | 1.47 $\pm$ 0.02                        |
| 35  | <i>Pediococcus pentosaceus</i> 08B228  | 4.18 $\pm$ 0.04  | 3.94 $\pm$ 0.04          | 1.71 $\pm$ 0.03                        |
| 36  | <i>Pediococcus pentosaceus</i> 08B262  | 3.39 $\pm$ 0.07  | 3.75 $\pm$ 0.05          | 1.43 $\pm$ 0.01                        |
| 37  | <i>Pediococcus pentosaceus</i> 08B268  | 4.25 $\pm$ 0.04  | 4.44 $\pm$ 0.06          | 1.64 $\pm$ 0.03                        |
| 38  | <i>Pediococcus pentosaceus</i> 08B277  | 3.98 $\pm$ 0.11  | 4.68 $\pm$ 0.04          | 1.54 $\pm$ 0.02                        |
| 39  | <i>Pediococcus pentosaceus</i> 08B279  | 3.29 $\pm$ 0.06  | 4.76 $\pm$ 0.02          | 1.41 $\pm$ 0.02                        |
| 40  | <i>Pediococcus pentosaceus</i> 08B285  | 3.56 $\pm$ 0.02  | 4.28 $\pm$ 0.04          | 1.72 $\pm$ 0.02                        |
| 41  | <i>Pediococcus pentosaceus</i> 08B296  | 2.83 $\pm$ 0.06  | 4.88 $\pm$ 0.06          | 1.57 $\pm$ 0.03                        |
| 42  | <i>Pediococcus pentosaceus</i> 08B297  | 3.58 $\pm$ 0.42  | 4.56 $\pm$ 0.04          | 1.53 $\pm$ 0.02                        |
| 43  | <i>Pediococcus pentosaceus</i> 09B378  | 3.44 $\pm$ 0.06  | 4.68 $\pm$ 0.04          | 1.47 $\pm$ 0.02                        |
| 44  | <i>Pediococcus pentosaceus</i> 09B383  | 3.02 $\pm$ 0.08  | 4.47 $\pm$ 0.04          | 1.37 $\pm$ 0.02                        |

|    |                                        |             |             |             |
|----|----------------------------------------|-------------|-------------|-------------|
| 45 | <i>Pediococcus pentosaceus</i> 09B391  | 3.87 ± 0.06 | 4.57 ± 0.02 | 1.73 ± 0.03 |
| 46 | <i>Pediococcus pentosaceus</i> 09B3154 | 4.44 ± 0.05 | 4.37 ± 0.05 | 1.64 ± 0.02 |
| 47 | <i>Pediococcus pentosaceus</i> 09B3184 | 3.89 ± 0.05 | 3.64 ± 0.05 | 1.58 ± 0.03 |
| 48 | <i>Pediococcus pentosaceus</i> 10B429  | 3.65 ± 0.07 | 4.12 ± 0.04 | 1.73 ± 0.02 |
| 49 | <i>Pediococcus pentosaceus</i> 10B280  | 3.86 ± 0.04 | 4.43 ± 0.02 | 1.46 ± 0.02 |
| 50 | <i>Pediococcus pentosaceus</i> 11R115  | 3.62 ± 0.02 | 4.82 ± 0.05 | 1.47 ± 0.01 |
| 51 | <i>Pediococcus pentosaceus</i> 11R161  | 4.28 ± 0.05 | 4.13 ± 0.07 | 1.56 ± 0.02 |
| 52 | <i>Pediococcus pentosaceus</i> 11R187  | 4.68 ± 0.02 | 4.27 ± 0.04 | 1.64 ± 0.03 |
| 53 | <i>Pediococcus pentosaceus</i> 11R1102 | 3.98 ± 0.05 | 4.38 ± 0.04 | 1.65 ± 0.02 |
| 54 | <i>Pediococcus pentosaceus</i> 12R298  | 2.95 ± 0.03 | 4.87 ± 0.03 | 1.62 ± 0.01 |
| 55 | <i>Pediococcus pentosaceus</i> 12R2104 | 3.74 ± 0.06 | 4.79 ± 0.02 | 1.70 ± 0.03 |
| 56 | <i>Pediococcus pentosaceus</i> 12R2187 | 3.58 ± 0.05 | 5.27 ± 0.04 | 1.81 ± 0.01 |
| 57 | <i>Pediococcus pentosaceus</i> 12R2192 | 5.79 ± 0.05 | 6.68 ± 0.02 | 1.89 ± 0.03 |
| 58 | <i>Lactobacillus plantarum</i> 01M09   | 3.55 ± 0.07 | 4.88 ± 0.04 | 1.64 ± 0.02 |
| 59 | <i>Lactobacillus plantarum</i> 01M11   | 3.68 ± 0.10 | 4.26 ± 0.06 | 1.62 ± 0.02 |
| 60 | <i>Lactobacillus plantarum</i> 01M12   | 3.24 ± 0.06 | 4.79 ± 0.04 | 1.71 ± 0.03 |
| 61 | <i>Lactobacillus plantarum</i> 01M18   | 3.54 ± 0.03 | 5.12 ± 0.06 | 1.78 ± 0.03 |
| 62 | <i>Lactobacillus plantarum</i> 01M20   | 3.92 ± 0.03 | 5.56 ± 0.02 | 1.82 ± 0.03 |
| 63 | <i>Lactobacillus plantarum</i> 01M24   | 4.21 ± 0.05 | 4.96 ± 0.04 | 1.66 ± 0.03 |
| 64 | <i>Lactobacillus plantarum</i> 01M25   | 4.94 ± 0.04 | 5.68 ± 0.02 | 1.80 ± 0.02 |
| 65 | <i>Lactobacillus plantarum</i> 01M26   | 3.21 ± 0.04 | 5.04 ± 0.05 | 1.84 ± 0.03 |
| 66 | <i>Lactobacillus plantarum</i> 01M28   | 3.67 ± 0.02 | 4.78 ± 0.02 | 1.47 ± 0.02 |
| 67 | <i>Lactobacillus plantarum</i> 01M30   | 3.85 ± 0.04 | 4.62 ± 0.04 | 1.50 ± 0.02 |
| 68 | <i>Lactobacillus plantarum</i> 02P109  | 3.56 ± 0.04 | 4.94 ± 0.04 | 1.48 ± 0.03 |
| 69 | <i>Lactobacillus plantarum</i> 02P119  | 3.62 ± 0.03 | 5.17 ± 0.03 | 1.76 ± 0.02 |
| 70 | <i>Lactobacillus plantarum</i> 02P120  | 3.42 ± 0.06 | 5.20 ± 0.05 | 1.83 ± 0.03 |
| 71 | <i>Lactobacillus plantarum</i> 02P121  | 3.86 ± 0.04 | 5.14 ± 0.04 | 1.77 ± 0.02 |
| 72 | <i>Lactobacillus plantarum</i> 03P2233 | 3.33 ± 0.07 | 4.82 ± 0.02 | 1.41 ± 0.03 |
| 73 | <i>Lactobacillus plantarum</i> 04P394  | 4.06 ± 0.02 | 4.78 ± 0.08 | 1.60 ± 0.03 |
| 74 | <i>Lactobacillus plantarum</i> 04P3188 | 4.35 ± 0.04 | 5.08 ± 0.10 | 1.79 ± 0.02 |
| 75 | <i>Lactobacillus plantarum</i> 04P3197 | 4.21 ± 0.02 | 5.32 ± 0.04 | 1.69 ± 0.03 |
| 76 | <i>Lactobacillus plantarum</i> 04P201  | 3.88 ± 0.02 | 4.84 ± 0.02 | 1.39 ± 0.02 |
| 77 | <i>Lactobacillus plantarum</i> 05S29   | 3.43 ± 0.06 | 4.66 ± 0.06 | 1.43 ± 0.01 |
| 78 | <i>Lactobacillus plantarum</i> 05S88   | 3.48 ± 0.04 | 5.24 ± 0.02 | 1.78 ± 0.03 |
| 79 | <i>Lactobacillus plantarum</i> 05S103  | 3.58 ± 0.02 | 4.47 ± 0.04 | 1.52 ± 0.02 |
| 80 | <i>Lactobacillus plantarum</i> 05S148  | 3.34 ± 0.05 | 4.68 ± 0.04 | 1.65 ± 0.03 |
| 81 | <i>Lactobacillus plantarum</i> 05S179  | 3.61 ± 0.05 | 4.66 ± 0.05 | 1.67 ± 0.02 |
| 82 | <i>Lactobacillus plantarum</i> 05S186  | 3.14 ± 0.06 | 4.58 ± 0.06 | 1.67 ± 0.01 |
| 83 | <i>Lactobacillus plantarum</i> 05S189  | 3.86 ± 0.04 | 4.78 ± 0.04 | 1.47 ± 0.03 |
| 84 | <i>Lactobacillus plantarum</i> 07B110  | 3.32 ± 0.04 | 4.63 ± 0.05 | 1.57 ± 0.03 |
| 85 | <i>Lactobacillus plantarum</i> 07B126  | 3.54 ± 0.02 | 5.00 ± 0.04 | 1.83 ± 0.03 |
| 86 | <i>Lactobacillus plantarum</i> 07B144  | 3.48 ± 0.04 | 5.14 ± 0.06 | 1.82 ± 0.02 |
| 87 | <i>Lactobacillus plantarum</i> 07B163  | 3.76 ± 0.06 | 4.96 ± 0.04 | 1.62 ± 0.02 |
| 88 | <i>Lactobacillus plantarum</i> 07B187  | 3.62 ± 0.07 | 4.82 ± 0.02 | 1.62 ± 0.03 |
| 89 | <i>Lactobacillus plantarum</i> 07B1138 | 3.36 ± 0.04 | 4.83 ± 0.02 | 1.56 ± 0.02 |
| 90 | <i>Lactobacillus plantarum</i> 07B1139 | 3.56 ± 0.02 | 4.77 ± 0.05 | 1.48 ± 0.03 |
| 91 | <i>Lactobacillus plantarum</i> 07B1168 | 3.98 ± 0.06 | 4.68 ± 0.04 | 1.52 ± 0.03 |
| 92 | <i>Lactobacillus plantarum</i> 08B212  | 4.86 ± 0.06 | 5.48 ± 0.02 | 1.81 ± 0.02 |

|     |                                        |             |             |             |
|-----|----------------------------------------|-------------|-------------|-------------|
| 93  | <i>Lactobacillus plantarum</i> 08B217  | 4.59 ± 0.02 | 5.23 ± 0.04 | 1.78 ± 0.01 |
| 94  | <i>Lactobacillus plantarum</i> 08B238  | 4.68 ± 0.06 | 4.96 ± 0.06 | 1.68 ± 0.03 |
| 95  | <i>Lactobacillus plantarum</i> 09B307  | 3.47 ± 0.09 | 4.88 ± 0.05 | 1.55 ± 0.02 |
| 96  | <i>Lactobacillus plantarum</i> 09B316  | 3.68 ± 0.06 | 4.58 ± 0.02 | 1.47 ± 0.03 |
| 97  | <i>Lactobacillus plantarum</i> 09B324  | 3.38 ± 0.06 | 4.47 ± 0.02 | 1.38 ± 0.02 |
| 98  | <i>Lactobacillus plantarum</i> 09B357  | 3.54 ± 0.07 | 4.69 ± 0.04 | 1.45 ± 0.03 |
| 99  | <i>Lactobacillus plantarum</i> 10B412  | 3.98 ± 0.04 | 4.83 ± 0.06 | 1.39 ± 0.02 |
| 100 | <i>Lactobacillus plantarum</i> 10B426  | 3.88 ± 0.02 | 4.54 ± 0.02 | 1.57 ± 0.03 |
| 101 | <i>Lactobacillus plantarum</i> 10B447  | 3.52 ± 0.04 | 4.38 ± 0.04 | 1.61 ± 0.02 |
| 102 | <i>Lactobacillus plantarum</i> 10B458  | 3.26 ± 0.02 | 4.55 ± 0.02 | 1.57 ± 0.02 |
| 103 | <i>Lactobacillus plantarum</i> 10B487  | 3.48 ± 0.02 | 5.14 ± 0.06 | 1.78 ± 0.03 |
| 104 | <i>Lactobacillus plantarum</i> 10B4101 | 3.44 ± 0.03 | 5.22 ± 0.02 | 1.78 ± 0.01 |
| 105 | <i>Lactobacillus plantarum</i> 10B4116 | 3.73 ± 0.04 | 4.88 ± 0.04 | 1.62 ± 0.02 |
| 106 | <i>Lactobacillus plantarum</i> 10B4122 | 3.84 ± 0.03 | 4.69 ± 0.02 | 1.51 ± 0.03 |
| 107 | <i>Lactobacillus plantarum</i> 10B4128 | 3.47 ± 0.04 | 4.74 ± 0.02 | 1.48 ± 0.03 |
| 108 | <i>Lactobacillus plantarum</i> 10B4147 | 3.12 ± 0.02 | 4.66 ± 0.05 | 1.53 ± 0.03 |
| 109 | <i>Lactobacillus plantarum</i> 10B4159 | 2.87 ± 0.06 | 5.10 ± 0.04 | 1.76 ± 0.02 |
| 110 | <i>Lactobacillus plantarum</i> 10B4181 | 2.24 ± 0.02 | 5.16 ± 0.04 | 1.70 ± 0.02 |
| 111 | <i>Lactobacillus plantarum</i> 10B4197 | 2.57 ± 0.05 | 5.06 ± 0.02 | 1.69 ± 0.03 |
| 112 | <i>Lactobacillus plantarum</i> 10B4227 | 3.23 ± 0.04 | 4.88 ± 0.02 | 1.57 ± 0.03 |
| 113 | <i>Lactobacillus plantarum</i> 10B4261 | 3.14 ± 0.06 | 4.58 ± 0.02 | 1.49 ± 0.02 |
| 114 | <i>Lactobacillus plantarum</i> 10B4267 | 3.28 ± 0.03 | 4.67 ± 0.05 | 1.64 ± 0.02 |
| 115 | <i>Lactobacillus brevis</i> 01M06      | 4.24 ± 0.02 | 4.98 ± 0.02 | 1.46 ± 0.02 |
| 116 | <i>Lactobacillus brevis</i> 01M19      | 4.83 ± 0.04 | 4.67 ± 0.05 | 1.66 ± 0.03 |
| 117 | <i>Lactobacillus brevis</i> 01M21      | 4.47 ± 0.02 | 5.28 ± 0.06 | 1.88 ± 0.03 |
| 118 | <i>Lactobacillus brevis</i> 01M22      | 5.23 ± 0.05 | 5.66 ± 0.04 | 1.86 ± 0.03 |
| 119 | <i>Lactobacillus brevis</i> 01M29      | 4.82 ± 0.06 | 5.46 ± 0.04 | 1.80 ± 0.01 |
| 120 | <i>Lactobacillus brevis</i> 02P116     | 3.88 ± 0.10 | 4.78 ± 0.02 | 1.69 ± 0.03 |
| 121 | <i>Lactobacillus brevis</i> 02P118     | 4.57 ± 0.06 | 5.02 ± 0.04 | 1.76 ± 0.02 |
| 122 | <i>Lactobacillus brevis</i> 03P2224    | 4.89 ± 0.04 | 5.10 ± 0.05 | 1.80 ± 0.02 |
| 123 | <i>Lactobacillus brevis</i> 03P226     | 4.53 ± 0.02 | 4.86 ± 0.02 | 1.61 ± 0.02 |
| 124 | <i>Lactobacillus brevis</i> 04P3167    | 5.14 ± 0.07 | 5.64 ± 0.02 | 1.88 ± 0.01 |
| 125 | <i>Lactobacillus brevis</i> 05S04      | 4.73 ± 0.07 | 4.35 ± 0.06 | 1.32 ± 0.02 |
| 126 | <i>Lactobacillus brevis</i> 05S16      | 4.68 ± 0.04 | 4.97 ± 0.04 | 1.53 ± 0.03 |
| 127 | <i>Lactobacillus brevis</i> 05S168     | 4.74 ± 0.03 | 5.28 ± 0.05 | 1.70 ± 0.03 |
| 128 | <i>Lactobacillus brevis</i> 05S178     | 4.92 ± 0.04 | 5.18 ± 0.04 | 1.72 ± 0.02 |
| 129 | <i>Lactobacillus brevis</i> 06SE269    | 3.78 ± 0.07 | 5.04 ± 0.02 | 1.81 ± 0.01 |
| 130 | <i>Lactobacillus brevis</i> 07B198     | 5.33 ± 0.04 | 5.52 ± 0.02 | 1.91 ± 0.02 |
| 131 | <i>Lactobacillus brevis</i> 08B201     | 4.13 ± 0.04 | 4.64 ± 0.02 | 1.58 ± 0.03 |
| 132 | <i>Lactobacillus brevis</i> 08B225     | 4.48 ± 0.05 | 4.84 ± 0.04 | 1.54 ± 0.01 |
| 133 | <i>Lactobacillus brevis</i> 08B291     | 4.02 ± 0.07 | 4.58 ± 0.02 | 1.69 ± 0.02 |
| 134 | <i>Lactobacillus brevis</i> 09B3105    | 3.88 ± 0.02 | 4.65 ± 0.05 | 1.62 ± 0.02 |
| 135 | <i>Lactobacillus brevis</i> 11R1143    | 3.64 ± 0.03 | 4.84 ± 0.02 | 1.60 ± 0.03 |
| 136 | <i>Lactobacillus brevis</i> 11R1149    | 3.26 ± 0.04 | 4.68 ± 0.02 | 1.67 ± 0.03 |
| 137 | <i>Lactobacillus brevis</i> 12R287     | 4.03 ± 0.04 | 4.86 ± 0.04 | 1.38 ± 0.02 |
| 138 | <i>Lactobacillus brevis</i> 12R2162    | 3.78 ± 0.04 | 4.96 ± 0.02 | 1.47 ± 0.01 |
| 139 | <i>Pediococcus acidilactici</i> 02P104 | 2.57 ± 0.02 | 4.64 ± 0.04 | 1.45 ± 0.03 |
| 140 | <i>Pediococcus acidilactici</i> 02P108 | 3.12 ± 0.04 | 5.03 ± 0.05 | 1.76 ± 0.02 |

|     |                                                                   |             |             |             |
|-----|-------------------------------------------------------------------|-------------|-------------|-------------|
| 141 | <i>Pediococcus acidilactici</i> 03P2187                           | 3.04 ± 0.07 | 5.12 ± 0.02 | 1.71 ± 0.03 |
| 142 | <i>Pediococcus acidilactici</i> 04P3107                           | 2.73 ± 0.04 | 4.84 ± 0.04 | 1.66 ± 0.02 |
| 143 | <i>Pediococcus acidilactici</i> 05S27                             | 3.54 ± 0.02 | 4.67 ± 0.06 | 1.70 ± 0.03 |
| 144 | <i>Pediococcus acidilactici</i> 06SE75                            | 3.32 ± 0.07 | 4.96 ± 0.02 | 1.61 ± 0.02 |
| 145 | <i>Pediococcus acidilactici</i> 06SE78                            | 3.62 ± 0.04 | 5.10 ± 0.02 | 1.74 ± 0.01 |
| 146 | <i>Pediococcus acidilactici</i> 06SE92                            | 3.83 ± 0.02 | 5.15 ± 0.04 | 1.78 ± 0.03 |
| 147 | <i>Pediococcus acidilactici</i> 06SE98                            | 2.87 ± 0.06 | 4.88 ± 0.02 | 1.66 ± 0.02 |
| 148 | <i>Pediococcus acidilactici</i> 06SE99                            | 2.39 ± 0.03 | 4.76 ± 0.06 | 1.70 ± 0.03 |
| 149 | <i>Pediococcus acidilactici</i> 06SE107                           | 3.86 ± 0.03 | 4.62 ± 0.04 | 1.45 ± 0.01 |
| 150 | <i>Pediococcus acidilactici</i> 06SE234                           | 3.23 ± 0.04 | 4.77 ± 0.05 | 1.54 ± 0.03 |
| 151 | <i>Pediococcus acidilactici</i> 06SE288                           | 2.78 ± 0.02 | 4.55 ± 0.02 | 1.53 ± 0.02 |
| 152 | <i>Pediococcus acidilactici</i> 06SE294                           | 2.56 ± 0.02 | 4.60 ± 0.04 | 1.47 ± 0.01 |
| 153 | <i>Pediococcus acidilactici</i> 06SE342                           | 2.94 ± 0.04 | 4.81 ± 0.02 | 1.48 ± 0.02 |
| 154 | <i>Pediococcus acidilactici</i> 11R1154                           | 3.28 ± 0.06 | 4.73 ± 0.05 | 1.60 ± 0.03 |
| 155 | <i>Pediococcus acidilactici</i> 12R2121                           | 3.31 ± 0.05 | 4.74 ± 0.02 | 1.58 ± 0.02 |
| 156 | <i>Pediococcus acidilactici</i> 12R2169                           | 3.68 ± 0.04 | 4.86 ± 0.02 | 1.57 ± 0.03 |
| 157 | <i>Enterococcus faecium</i> 06SE279                               | 4.64 ± 0.02 | 5.46 ± 0.04 | 1.80 ± 0.03 |
| 158 | <i>Enterococcus faecium</i> 07B1187                               | 4.58 ± 0.04 | 5.02 ± 0.06 | 1.87 ± 0.01 |
| 159 | <i>Enterococcus faecium</i> 12R204                                | 3.94 ± 0.03 | 5.15 ± 0.03 | 1.79 ± 0.02 |
| 160 | <i>Enterococcus faecium</i> 12R226                                | 4.88 ± 0.04 | 5.74 ± 0.04 | 1.80 ± 0.02 |
| 161 | <i>Enterococcus faecium</i> 12R232                                | 4.96 ± 0.02 | 5.88 ± 0.02 | 1.88 ± 0.03 |
| 162 | <i>Lactobacillus plantarum</i> subsp. <i>plantarum</i><br>02P117  | 3.54 ± 0.04 | 4.84 ± 0.06 | 1.61 ± 0.03 |
| 163 | <i>Lactobacillus plantarum</i> subsp. <i>plantarum</i><br>05S197  | 3.48 ± 0.04 | 4.74 ± 0.02 | 1.66 ± 0.02 |
| 164 | <i>Lactobacillus plantarum</i> subsp. <i>plantarum</i><br>11R1131 | 3.86 ± 0.04 | 4.61 ± 0.04 | 1.67 ± 0.02 |
| 165 | <i>Lactobacillus plantarum</i> subsp. <i>plantarum</i><br>12R238  | 3.48 ± 0.03 | 4.75 ± 0.03 | 1.48 ± 0.03 |
| 166 | <i>Enterococcus durans</i> 09B374                                 | 4.42 ± 0.05 | 5.26 ± 0.06 | 1.75 ± 0.03 |
| 167 | <i>Pediococcus parvulus</i> 03P226                                | 3.28 ± 0.04 | 4.72 ± 0.04 | 1.68 ± 0.02 |
